1 Increased nitrogen fixation and remobilization may contribute to higher seed protein without a  
2 yield penalty in a soybean introgression line

3

4 Anna M. Locke<sup>a,b,\*</sup> and Martha E. Ramirez<sup>a</sup>

5 <sup>a</sup>Soybean & Nitrogen Fixation Research Unit, Agricultural Research Service, United States

6 Department of Agriculture, 3127 Ligon St., Raleigh, NC 27695, USA

7 <sup>b</sup>Department of Crop and Soil Sciences, North Carolina State University, Raleigh, NC 27696-

8 7620, USA

9 \*Corresponding author. Email address: [Anna.Locke@usda.gov](mailto:Anna.Locke@usda.gov). Mailing address: 4112 Williams

10 Hall, 101 Derieux Place, Raleigh, NC 27696-7620, USA

11 **Abstract**

12 The development of soybean varieties with higher seed protein concentration has been hindered  
13 by a negative correlation between seed protein concentration and yield. Benning HP, a genotype  
14 that breaks this tradeoff, contains a high protein allele introgressed into the cultivar Benning.  
15 Because seed protein is thought to be limited by N, field and growth chamber experiments were  
16 performed to identify the N flux(es) that enable Benning HP's increased seed protein without a  
17 yield penalty. When the N source was completely controlled in growth chambers, Benning HP  
18 was able to fix more N than its recurrent parent, but this response depended on the strain of the  
19 rhizobia symbiont and was not observed at all developmental stages. In the field, Benning HP  
20 remobilized N from its leaves at a higher rate during seed fill, but this response was only  
21 observed in one of the years studied. These results demonstrate that Benning HP has higher  
22 potential for N fixation and N remobilization from vegetative tissue compared to its lower  
23 protein recurrent parent, but those traits are not consistently expressed and may depend on  
24 environmental and sink control.

25

26 Keywords: soybean; seed protein; nitrogen fixation; nitrogen remobilization

27

28 Abbreviations: DAT, days after transplanting; DAP, days after planting; LAI, leaf area index

## 29 **1. Introduction**

30 A substantial portion of the value in soybean [*Glycine max* (L.) Merr.] seed is derived from its  
31 meal protein, which is an important source of nutrition for poultry and livestock worldwide.  
32 Soybean seed protein concentration ranges from 35% to over 50% among genotypes (Hwang et  
33 al. 2014, Zhang et al 2018). However, the negative correlation between seed protein  
34 concentration and yield is a major hurdle in exploiting this phenotypic diversity to breed  
35 agronomically elite, high protein soybean varieties (Brzostowski et al., 2017). While yield has  
36 steadily increased, seed protein concentration has decreased with year of cultivar release  
37 (Mahmoud et al., 2006; Morrison et al., 2000). It has been hypothesized that the persistence of  
38 greenness, which prolongs CO<sub>2</sub> assimilation during seed fill—increasing yield—has reduced the  
39 N available for remobilization from vegetative tissue (Kumudini et al., 2002).

40 N is primarily transported into the seed coat in the form of ureides and from seed coat to  
41 developing seed as glutamine and asparagine (Rainbird et al., 1984b), and energy must be  
42 expended in the seed for the synthesis of storage proteins. *In vitro* studies of soybean seed  
43 development have found that seed protein accumulation is determined by the supply of N into  
44 the seed (Pipolo et al., 2004; Saravitz and Raper, 1995). Similarly, in *Brassica napus* and  
45 *Brassica carinata*, final seed protein concentration correlated positively with total amino acid  
46 content in leaf phloem sap (Lohaus and Moellers, 2000). When the soybean supply/sink ratio  
47 was altered by removing 50% of the pods at each node, seeds accumulated significantly more  
48 protein (as % of seed weight) when the assimilate supply per seed was increased (Rotundo et al.,  
49 2011).

50 Three N fluxes can potentially contribute to developing seeds: uptake from the soil,  
51 biological N fixation, and remobilization from vegetative tissue. The relative contribution of

52 these components to seed N is variable among genotypes and environmental conditions (Leffel et  
53 al., 1992b; Mastrodomenico et al., 2013; Zeiher et al., 1982). It has been hypothesized that the  
54 large N demand in developing soybean seeds requires substantial N remobilization from  
55 vegetative tissue, triggering leaf senescence and limiting the seed fill period (Sinclair and de Wit,  
56 1976, 1975). Later work found that the proportion of seed N from remobilization to be anywhere  
57 from 30% to 100%, depending on genotype (Zeiher et al., 1982). Other studies found that up to  
58 90% of seed N may be supplied by N fixation, and that N fixation continues through most of the  
59 seed fill period (Leffel et al., 1992a; Mastrodomenico et al., 2013). A study with three high  
60 protein and three average protein soybean genotypes found no correlation between redistributed  
61 N from vegetative tissue and total N in mature seeds (Egli and Bruening, 2007). These  
62 discrepancies in the estimated contribution of remobilization to seed N may be partly linked to  
63 genetic improvement of soybean during the 20<sup>th</sup> century: when varieties released in the 1930's  
64 were compared with varieties released in the 80's and 90's, the earlier genotypes remobilized the  
65 same amount of N from vegetative tissue, but the newer genotypes were able to accumulate  
66 significantly more N during the seed fill period than the older genotypes (Kumudini et al., 2002).

67 A genome-wide association study identified 17 loci on 10 chromosomes that are  
68 significantly associated with seed protein concentration (Hwang et al., 2014). One of the loci  
69 identified in that study, on chromosome 20, resulted in mean protein increase from 41.46% to  
70 44.32%. In a genome-wide analysis including 934 accessions from maturity groups (MG) IV-VI,  
71 this high protein locus was refined to a 1 Mbp region (Vaughn et al., 2014), but the specific  
72 gene(s) that determine this trait have yet to be resolved. A protein-determining locus in this  
73 region of chromosome 20 (hereafter called Gm20) has also been identified in genotypes of *G.*  
74 *max* and *Glycine soja* (Diers et al., 1992; Warrington et al., 2015). One of these analyses was

75 performed in a recombinant inbred population derived from a cross between Benning, a high-  
76 yielding MG VII cultivar with moderate seed protein (Boerma et al., 1997), and Danbaekkong  
77 (Kim et al., 1996), a lower-yielding MG V cultivar with very high seed protein. This locus  
78 explained 55% of the variation in seed protein within the bi-parental population (Warrington et  
79 al., 2015). From this population, the Danbaekkong Gm20 allele was backcrossed into Benning to  
80 create a near-isogenic line, Benning HP, with ca. 3% increase in seed protein over Benning,  
81 similar agronomic traits, and no yield penalty (Prenger et al., 2019).

82 Benning HP's seed protein concentration improvement over Benning without yield loss is  
83 unique; while the Gm20 allele is linked to seed protein, it does not break through the protein-  
84 yield tradeoff in most genetic backgrounds (Brzostowski et al., 2017). An understanding of the  
85 physiological process(es) by which Benning HP achieves this increase could lead to new  
86 strategies for improving seed protein concentration in other genetic backgrounds. This study  
87 aimed to identify differences in N fluxes that contribute to higher seed protein without a yield  
88 loss in Benning HP, which possesses the Danbaekkong Gm20 allele, compared to its recurrent  
89 parent Benning. N uptake and fixation were evaluated in growth chamber experiments, where N  
90 sources and rhizobia could be completely controlled, while N remobilization from aboveground  
91 vegetative tissue was evaluated in field experiments.

92

93

## 94 **2. Materials and Methods**

### 95 *2.1. Field experiment*

96 Seeds of soybean cultivars Benning (Boerma et al., 1997) and Benning HP (Prenger et al., 2019)  
97 were sown on 26 May 2016 and 30 June 2017 at Central Crops Research Station in Clayton, NC.  
98 Soybeans at this research station were planted in a three-year rotation with corn and cotton. In  
99 2016 the experiment was planted in a Norfolk loamy sand, and in 2017 the experiment was  
100 planted in a field with variable Appling sandy loam and eroded Cecil sandy clay loam. Plots  
101 were arranged in a randomized complete block design with four replicates of each genotype and  
102 96.5 cm row spacing. Within-row planting density was 39.4 seeds per m. In 2016, plots were 3  
103 rows wide and 3.7 m long; in 2017, plot size was increased to 6 rows wide and 5.5 m long to  
104 facilitate destructive aboveground biomass and leaf area index (LAI) measurements.

105 On field sampling dates, four 2-cm diameter disks were cut from uppermost, fully  
106 expanded leaves of two plants per plot on each sampling day, and three pods were removed from  
107 main stem nodes in the middle (2016) or upper (2017) third of the canopy from two plants per  
108 plot on each sampling day. Samples were dried at 60°C for a minimum of 3 days for C and N  
109 analysis.

110 When Benning and Benning HP were in developmental stage R5 in 2017, all plants in 1  
111 m of a center row in each plot were cut down at the soil level. These rows had not been used for  
112 tissue sampling. Plots were harvested at 84 – 88 days after planting (DAP). Leaflets and pods  
113 were separated from stems and petioles, and total leaf area was measured with a leaf area meter  
114 (LI-3100, LI-COR, Lincoln, NE). All tissues were dried at 60°C for a minimum of 3 days, and  
115 leaf, seed, pod, and stem + petiole dry weight was measured for each plant.

116 At maturity, center rows were harvested with a single-row plot combine (Almaco,  
117 Nevada, IA). After seeds were weighed, seed protein concentration was measured using near-  
118 infrared spectroscopy (DA-7250, Perten Instruments North America, Springfield, IL). Seed  
119 protein concentration is reported on a 13% moisture basis.

120

## 121 2.2. Chamber experiment 1

122 Seeds of Benning and Benning HP were surface sterilized with 95% ethanol and 1% NaOCl  
123 (Somasegaran and Hoben, 1985) and incubated in rolled, moistened germination paper at 29°C  
124 for two days to germinate. Germinated seeds were transplanted into 0.5 L pots filled with  
125 vermiculite. The vermiculite was saturated with water before planting. Three germinated seeds  
126 were transplanted per pot and thinned to one plant per pot a week after transplanting. Plants were  
127 grown at 26°C day/22°C night with a 9 h photoperiod, with the addition of a 3 h incandescent  
128 dark interruption for the first 35 days to suppress flowering.

129 Five plants per genotype were assigned to each treatment. The four treatments were: (1)  
130 NH<sub>4</sub>NO<sub>3</sub> in nutrient solution, (2) inoculation with *Bradyrhizobium diazoefficiens* strain USDA  
131 110 [formerly classified as *Bradyrhizobium japonicum* (Delamuta et al., 2013)], (3) inoculation  
132 with *Bradyrhizobium elkanii* strain USDA 31, or (4) no N fertilizer or inoculation. The rhizobia  
133 strains contrast in N fixation efficiency, with *B. diazoefficiens* USDA 110 fixing N more  
134 efficiently than *B. japonicum* USDA 31 (Schubert et al., 1978). The N-free plants were included  
135 to monitor for potential rhizobia contamination in the substrate and to measure N derived from  
136 cotyledons prior to excision. Cotyledons were excised 8 days after transplanting (DAT) to hasten  
137 reliance on N treatments. All plants were fed 50% Long-Ashton nutrient solution (Hewitt, 1966),  
138 modified by omitting NH<sub>4</sub>NO<sub>3</sub> for the inoculated plants and the N-free plants and with 7 mM

139  $\text{NH}_4\text{NO}_3$  for the remaining treatment. Inoculations were conducted immediately after  
140 transplanting, by adding 1 mL of the respective rhizobia culture grown in yeast extract-mannitol  
141 medium (Somasegaran and Hoben, 1985) and containing approximately  $10^8$  CFU  $\text{ml}^{-1}$  of *B.*  
142 *diazoefficiens* USDA 110 or *B. elkanii* USDA 31 to the transplanted seed. Genotypes and  
143 treatments were fully randomized within the growth chamber.

144 For the first 4 DAT, each pot received 20 – 30 ml of deionized water daily. Beginning at  
145 5 DAT, each pot received 50 ml of water daily, and this was followed by 50 ml of nutrient  
146 solution every other day. At 26 DAT, water and nutrient solution were both increased to 80 ml  
147 daily. All plants were harvested 45 DAT. Plants were separated into shoots, roots and nodules  
148 and dried at  $60^\circ\text{C}$  for 3 days for biomass determination, followed by C and N analysis.

149

### 150 2.3. Chamber experiment 2

151 Benning and Benning HP seeds were germinated as described above. Germinated seeds were  
152 transplanted into 6 L pots filled with vermiculite and approximately 80 g of crushed oyster shells  
153 to control acidification of the rhizosphere in later developmental stages (Israel and Jackson,  
154 1982). The vermiculite was saturated with water before planting. Three germinated seeds were  
155 transplanted per pot and thinned to one plant per pot a week after transplanting.

156 Germinated seeds were inoculated with *B. diazoefficiens* USDA 110 immediately after  
157 transplanting as described above and grown in a controlled environment growth chamber under  
158 the same conditions as described above. For each genotype, 20 pots were inoculated, and seven  
159 pots remained uninoculated. Genotypes and treatments were fully randomized within the growth  
160 chamber. For the first four DAT, 30 ml of deionized water were added daily; then, vermiculite  
161 was flushed daily with 600 ml of deionized water followed by the addition of 400 ml of N-free



162 nutrient solution. Nutrient solution was modified 50% Long-Ashton solution as described above.  
163 After developmental stage V5, water and nutrient solution were increased to 1 L and 400 mL,  
164 respectively, twice per day. Cotyledons were excised at 8 DAT.

165 Five inoculated plants per genotype were harvested at 33, 65, 82, and 132 DAT, when the  
166 plants were in developmental stages V5, R5, R6, and R8 (maturity). The non-inoculated plants,  
167 which received no N, were also harvested at the first sampling date (33 DAT) to measure N  
168 derived from cotyledons prior to excision. At harvest dates, whole plants were separated into  
169 nodules, roots, vegetative shoot tissue, and reproductive tissue, and dried at 60°C for a minimum  
170 of 3 days. Biomass, C, and N content were measured for dry tissue. Seed protein concentration in  
171 mature seed was measured with near-infrared spectroscopy.

172

#### 173 *2.4. Carbon/nitrogen measurements*

174 Samples from the field and from chambers were dried at 60°C for a minimum of 3 days before  
175 analysis. Nodules and leaf disks were ground in 2 ml tubes containing two 3-mm stainless steel  
176 grinding balls, shaken at 1400 strokes min<sup>-1</sup> for 45 sec in a homogenizer (Geno/Grinder 2000,  
177 Spex CertiPrep, NJ). Whole leaves, stems, seeds, pod shells, and roots were ground using a  
178 Wiley mill (Model 4, Thomas Scientific, NJ). Small amounts of seeds, such as the three pod  
179 samples collected on field sampling dates, were ground with a centrifugal mill (ZM100, Retsch,  
180 Germany). Tissue C and N content was measured with an elemental analyzer (FlashEA 1112,  
181 Thermo Scientific, Walham, MA), and the percentage of C and N per sample was calculated with  
182 the instrument's software (Eager Smart, Thermo Scientific, Walham, MA). Biomass and percent  
183 N values were multiplied to estimate total N in plant tissues.

184

## 185 2.5. Leaf chlorophyll measurements

186 In the field, two 2-cm diameter disks were cut from uppermost, fully expanded leaves of two  
187 plants per plot on each sampling day and flash frozen in liquid N. These disks were sampled  
188 from the same leaves on the same days as the disks used for leaf C and N measurements. Leaf  
189 disks were stored at -80°C until chlorophyll extraction. Chlorophyll was measured according to  
190 Porra et al. (1989). Briefly, frozen leaf disks were ground in chilled methanol. Methanol was  
191 decanted and centrifuged at 2500 rpm for 10 min. The supernatant was transferred to a cuvette,  
192 and absorbance was measured at 652.0 nm and 665.2 nm. Chlorophyll concentrations in the  
193 supernatant ( $\mu\text{g/mL}$ ) were calculated using the equations:

$$194 \quad \text{Chlorophyll } a = 16.29(A^{665.2}) - 8.54(A^{652.0}) \quad (1)$$

$$195 \quad \text{Chlorophyll } b = 30.66(A^{652.0}) - 13.58(A^{665.2}) \quad (2)$$

$$196 \quad \text{Chlorophyll } a + b = 22.12(A^{652.0}) + 2.71(A^{665.2}) \quad (3)$$

197

## 198 2.6. Statistical analysis

199 Chamber experiments 1 and 2 were completely randomized designs. Two-way analysis of  
200 variance (ANOVA) was performed in PROC MIXED (SAS Inc., Cary, NC), and genotype and N  
201 treatment (experiment 1) or developmental stage (experiment 2) were treated as fixed effects.  
202 Pairwise differences between genotypes within N treatment or developmental stage were  
203 calculated with *F*-tests where appropriate using the slice option. *P*-values were adjusted to  
204 control the false discovery rate where indicated in tables and figures (Benjamini and Hochberg,  
205 1995).

206 Each year of the field experiment was a randomized complete block design. The blocking  
207 factor was included in all statistical models as a random effect and was dropped from a model

208 when its covariance parameter estimate was equal to or less than 0. Final harvest parameters,  
209 LAI, and biomass harvest parameters were analyzed using type 3 ANOVA in PROC MIXED,  
210 with genotype treated as a fixed effect and block as a random effect.

211 To evaluate genotypic differences in leaf and seed N concentration and C/N, seed weight,  
212 and leaf chlorophyll concentration throughout each growing season, a linear model with repeated  
213 measures was fitted in PROC MIXED with restricted maximum likelihood estimation. Genotype  
214 and DAP were fixed effects, block was a random effect, and DAP was the repeated effect with  
215 genotype\*rep as its subject. Differences between genotypes within DAP were calculated with *F*-  
216 tests using the slice option, and the resulting *p*-values were adjusted to control the false discovery  
217 rate. To evaluate the rates of change for leaf N concentration, leaf C/N, and leaf chlorophyll  
218 during the seed fill period, this model was changed so that DAP was a continuous variable rather  
219 than a repeated effect.

220 In chamber experiment 2 and in the field experiment, biomass parameters and N content  
221 were measured at successive developmental stages. These values were used to calculate N lost  
222 from vegetative tissue or gained in reproductive tissue between developmental stages. Because  
223 total N per organ was destructively measured for different groups of plants at each  
224 developmental stage, replicated values for N lost or N gained between stages could not be  
225 obtained and tested statistically. However, standard errors (SE) of the means were propagated  
226 using the formula:

227 
$$SE_{difference} = \sqrt{SE_a^2 + SE_b^2} \quad (4)$$

### 228 3. Results

#### 229 3.1. Benning HP has greater N assimilation potential when inoculated with *B. diazoefficiens*

##### 230 USDA 110

231 In chamber experiment 1, plants were supplied with one of three N sources to determine if  
232 Benning HP is able to assimilate more N than Benning, and to determine if differences in N  
233 assimilation depend on the source of N. The three N sources tested were  $\text{NH}_4\text{NO}_3$  fertilizer,  
234 inoculation with *B. diazoefficiens* USDA 110, or inoculation with *B. elkanii* USDA 31. All plants  
235 were harvested 45 DAT. Differences in nitrogen supply influenced the rate of development: at 45  
236 DAT, plants inoculated with the more efficient rhizobia strain, USDA 110, were at  
237 approximately developmental stage V6, plants inoculated with less efficient rhizobia strain  
238 USDA 31 were around V4, and plants fed  $\text{NH}_4\text{NO}_3$  were around V7. Non-inoculated plants did  
239 not form nodules, and vermiculite contains no plant-available N, so the N in the no-N plants was  
240 derived from stored N prior to cotyledon excision. No-N plants were extremely stunted and  
241 chlorotic, as would be expected for severe N deficiency. The average cotyledon N value for each  
242 genotype was subtracted from total plant N in the  $\text{NH}_4\text{NO}_3$  fertilizer and rhizobia inoculation  
243 treatments to calculate total N assimilated.

244 N treatment and genotype had a significant effect on total N assimilation, while the  
245 genotype  $\times$  treatment effect was not statistically significant (Table 1). Plants that received  
246  $\text{NH}_4\text{NO}_3$  assimilated the most N per plant (Fig. 1), reflecting the 2-3 weeks after transplanting  
247 and inoculation required to develop functional nodules. Plants inoculated with *B. diazoefficiens*  
248 USDA 110 fixed more N than plants inoculated with *B. elkanii* USDA 31. Given the low  
249 practical risk of accepting a higher type I error rate in the interaction effect to consider the more  
250 biologically interesting within-group tests, we conducted *F*-tests for differences between the

251 genotypes within each N treatment. Total N assimilated was not significantly different between  
252 genotypes in the plants that were fed fertilizer containing  $\text{NH}_4\text{NO}_3$  ( $p = 0.0828$ ) or inoculated  
253 with *B. elkanii* USDA 31 ( $p = 0.5829$ ). When inoculated with *B. diazoefficiens* USDA 110,  
254 Benning HP assimilated significantly more N than Benning ( $p = 0.0120$ ) (Fig. 1).

255 Total N assimilated per plant was divided by total nodule weight per plant to calculate N  
256 fixed per nodule weight. In chamber experiment 1, Benning HP fixed significantly more N per  
257 nodule weight than Benning when inoculated with *B. diazoefficiens* USDA 110 but not when  
258 inoculated with *B. elkanii* USDA 31 (Table S1).

259

### 260 3.2. Benning HP's greater N fixation is not observed at every developmental stage

261 Subsequently, a second growth chamber experiment was conducted to determine if the  
262 observed N fixation advantage in Benning HP is consistent throughout development. In chamber  
263 experiment 2, Benning and Benning HP were inoculated only with *B. diazoefficiens* USDA 110  
264 and harvested at developmental stages V5, R5, R6, and R8 (maturity). As expected, seed protein  
265 concentration at maturity was significantly higher in Benning HP than in its recurrent parent, and  
266 seed N concentration and C/N at maturity were also significantly different between the two  
267 genotypes (Table 2). Although seed production in a growth chamber does not scale to yield, seed  
268 weight per plant at maturity was not significantly different between the two genotypes.

269 Total N fixed per plant was measured at V5, R5, R6, and R8. Although the  
270 developmental stage effect was significant for every organ, the genotype and genotype\*stage  
271 effects were only significant for whole plants and for reproductive tissue (pods + seeds) (Table  
272 3). Based on pairwise tests within developmental stages, Benning HP had significantly more

273 total N in reproductive tissue only at maturity, which drove the difference in total N fixed at this  
274 developmental stage (Fig. 2).

275 As in the first chamber experiment, total N assimilated was divided by nodule weight to  
276 calculate N fixed per nodule weight. There were not significant differences between genotypes in  
277 N fixed per nodule weight at V5, R5, or R6 (Table S1). Insufficient nodule tissue remained for N  
278 measurement at R8, so N fixed per nodule weight at maturity could not be calculated.

279

280 *3.3. In growth chambers, Benning HP's greater reproductive N at maturity must be attributed to*  
281 *N fixation*

282 For chamber experiment 2, the maximum amount of N that could have been remobilized  
283 from vegetative tissue into reproductive tissue between developmental stages was estimated from  
284 differences in N content between developmental stages. Vegetative N lost was calculated as the  
285 difference in vegetative N (leaf, stem, root, and nodule) between developmental stages (Table 4).  
286 Because the N remaining in abscised leaves was not measured, this value represents the  
287 maximum potential N remobilization from vegetative into reproductive tissue during seed  
288 development. Reproductive N gained was calculated as the difference in reproductive N (seed  
289 and pod) between developmental stages. In this chamber experiment, the amount of reproductive  
290 N gained was always greater than vegetative N lost. Thus, N remobilization cannot have  
291 contributed all of the N in reproductive tissue, and the rest of reproductive N must come from N  
292 fixation occurring during seed fill. The two genotypes lost similar amounts of N from vegetative  
293 tissue and gained similar amounts of N in reproductive tissue from R5 to R6 (Table 4); thus, the  
294 estimate for N fixed from R5 to R6 was also similar between the two genotypes. From R6 to R8,  
295 the two genotypes again lost similar amounts of N from vegetative tissue. During the same

296 period, however, Benning HP gained substantially more N in its reproductive tissue. Thus,  
297 Benning HP may have fixed twice as much N as Benning from R6 to R8, and the propagated  
298 standard errors for these estimates do not overlap (Table 4).

299

### 300 *3.4. Higher N remobilization is not consistent in the field*

301 Benning and Benning HP were grown in the field in 2016 and 2017 to examine nitrogen  
302 remobilization during seed fill. Seed protein concentration at harvest was significantly higher in  
303 Benning HP than in Benning for both years, while yield was not significantly different between  
304 the genotypes (Table 5). Seed N concentration was significantly higher in Benning HP only in  
305 2017, and seed size was significantly smaller in Benning HP in both years.

306 LAI and aboveground biomass were measured in 2017 for 1 m rows harvested at DAP 84  
307 – 88. Both genotypes were in developmental stage R5 at this time. LAI and aboveground  
308 biomass were not significantly different between genotypes (Table S2). Percent N was measured  
309 for aboveground organs to calculate total aboveground N as well as vegetative and reproductive  
310 N. There were no differences between the genotypes in total aboveground N, aboveground  
311 vegetative N (leaf N + stem N), or reproductive N (seed + pod shell N) at R5 (Table S2). At the  
312 time of these measurements, seeds had gained one-third or less of their final dry weight (Fig.  
313 3B).

314 The seed N gained from R5 to R8 was calculated as it was for growth chamber  
315 experiment 2, from differences in N at each developmental stage (Table S3). For Benning and  
316 Benning HP in the field, the amount of seed N gained from R5 to R8 was smaller than the  
317 amount of aboveground N in vegetative tissue at R5 which could have been remobilized (Table  
318 S2, S3). The standard error estimates for seed N gained overlap greatly. Thus, it was not possible

319 to estimate from these data how much N assimilation occurred during this time period or if N  
320 assimilation may have differed between genotypes.

321 Seed growth in Benning and Benning HP was examined in both years. Seed fill began  
322 fewer DAP in 2017, because the planting date was much later that year. In 2016, the overall  
323 effect of genotype on individual seed dry weight was significant (Fig. 3A). Individual seed  
324 weight tended to be higher in Benning late in seed fill in 2016, but pairwise comparisons were  
325 not significant on any specific sampling dates during seed fill, and genotype did not have a  
326 significant effect on individual seed weight during seed fill 2017 (Fig. 3B). Genotype had a  
327 significant effect on seed N concentration (Fig. 3C – D) and on seed C/N (Fig. 3E – F)  
328 throughout seed fill in both years, and the pairwise difference between genotypes was  
329 significantly different on almost every measurement day through both years. In 2017, seeds were  
330 too small on the first sampling date to measure C and N content.

331 In leaves, genotype had a significant effect on N concentration and on C/N across the  
332 growing season in 2016, but not in 2017 (Fig. S1A, S1B). Differences between the two  
333 genotypes were not significant on individual measurement days during vegetative development  
334 or during flowering, but leaf N concentration became significantly lower in Benning HP by the  
335 end of the seed fill period in 2016 (Fig. S1A), and leaf C/N diverged a few sampling dates earlier  
336 (Fig. S1C), suggesting more N depletion from leaves during the seed fill period. The same leaf N  
337 concentration and C/N data from the seed fill period were then analyzed with DAP treated as a  
338 continuous variable instead of a repeated effect to test if the slope of leaf N concentration and  
339 leaf C/N over time was different between the two genotypes. In 2016, genotype and  
340 genotype\*DAP effects were significant across the seed fill period for leaf C/N and leaf N  
341 concentration (Fig. 4A, 4C). The slope of predicted leaf N concentration over time was



342 significantly lower for Benning HP than for Benning, while the slope of predicted leaf C/N over  
343 time was significantly higher in Benning HP. However, genotype and genotype\*DAP effects  
344 were not significantly different in 2017 (Fig. 4B, 4D).

345 Leaf chlorophyll was measured for the same DAP to assess whether differences in N  
346 remobilization rates could be detected through changes in leaf chlorophyll content. Despite the  
347 differences found for leaf N concentration and leaf C/N, the genotype and genotype\*DAP effects  
348 for leaf chlorophyll in 2016 were not significantly different between Benning and Benning HP  
349 (Fig. S2).

#### 350 4. Discussion

351 The primary goal of this study was to identify the N flux(es) that enable higher seed protein  
352 without a yield penalty in Benning HP compared to its recurrent parent, Benning. In these  
353 experiments, Benning HP was capable of greater N fixation when N sources were controlled in  
354 growth chambers and of a higher rate of N depletion from vegetative tissue during seed fill in the  
355 field, but neither of these traits was observed consistently. Strikingly, Benning HP plants  
356 inoculated with *B. diazoefficiens* USDA 110 in growth chambers fixed over twice as much N on  
357 average from R6 to maturity. Differences in seed protein concentration between two unrelated  
358 genotypes of similar yield potential have previously been linked to higher N fixation during seed  
359 fill period (Leffel et al., 1992a). In a greenhouse study, N fixation across reproductive  
360 development, measured by integrating acetylene reduction measurements over time, was found  
361 to be significantly and positively correlated with seed protein concentration, while integrated N  
362 fixation was not significantly correlated with yield (Fabre and Planchon, 2000).

363 *B. diazoefficiens* USDA 110 is more efficient at fixing N than *B. elkanii* USDA 31, and  
364 this has been linked to the presence of a hydrogenase in the nodule which recycles H<sub>2</sub> evolved  
365 from the nitrogenase-catalyzed reaction (Caldwell and Vest, 1970; Schubert et al., 1978). As  
366 expected, plants inoculated with *B. diazoefficiens* USDA 110 in this study fixed more N and had  
367 greater dry weight across genotypes than those inoculated with *B. elkanii* USDA 31. The lower  
368 N fixation efficiency of *B. elkanii* USDA 31 restricted the higher N fixation potential of Benning  
369 HP that was observed with *B. diazoefficiens* USDA 110. The native rhizobia population was not  
370 characterized for the field experiment, but a prior analysis in a different soil type at the same  
371 research station found the majority of nodules to be infected with rhizobia belonging to serotypes  
372 31/94, 46/76, and 76 (Ramirez et al., 1997). In that study, only about 15% of the samples isolated

373 from the research station had high N fixation capacity, as does *B. diazoefficiens* USDA 110,  
374 while ca. 20% had low N fixation capacity like *B. elkanii* USDA 31, and the rest had  
375 intermediate N fixation capacity. Thus, it is possible that in our field experiment, Benning HP's  
376 potential to supply more N to developing seeds from N fixation was restricted by the efficiency  
377 of rhizobia strain(s) that were present in soil.

378         The rate of N remobilization, measured as the slope of leaf C/N over time, from Benning  
379 HP leaves was only higher in one of the two years of the field experiment, despite Benning HP  
380 maintaining higher seed protein concentration and similar yield to Benning in both years. This  
381 variability in N remobilization between years, together with the growth chamber results, do not  
382 support the self-destructive hypothesis, which suggested that high seed N requirements in  
383 soybean trigger leaf senescence and thus limit the seed fill period (Sinclair and de Wit, 1975).  
384 Under the artificial, but optimal, environmental conditions of the growth chambers, the high N  
385 requirement in developing seeds was met by sustained N fixation though seed fill in both  
386 Benning and Benning HP, as remobilized N accounted for less than half of the N in each  
387 genotype at maturity. In the field, Benning HP produced the same seed yield as Benning despite  
388 remobilizing N from leaves at a higher rate in 2016. This suggests that under favorable  
389 environmental conditions, leaves can continue to assimilate carbon and thus fuel N fixation well  
390 into the seed fill period, and that environmental cues may play a larger role than seed N demand  
391 in triggering leaf senescence. Because the carbon demand for N fixation is high (Rainbird et al.,  
392 1984a), this implies that leaf senescence may actually have been delayed relative to seed  
393 development if photosynthesis continued at rates necessary to sustain nodule function.

394         The data from these experiments cannot conclusively determine if seed composition  
395 differences in Benning HP are source- or sink-driven. However, differences in seed N

396 concentration and seed C/N between Benning and Benning HP were established early in seed  
397 development, when seeds had gained less than a third of their final weight. Leaf C/N had not yet  
398 diverged between the two genotypes this early in seed development. These observations, together  
399 with the intermittent differences in N fixation and N remobilization rate, suggest that the  
400 Benning HP's higher seed N may be more dependent on N sink strength than on uniformly  
401 higher N fixation or N remobilization.

402 In growth chamber experiment 2, the higher total N assimilation in Benning HP at  
403 maturity was accompanied by substantially higher mature seed weight per plant (ca. 20%),  
404 congruent with a previous finding that total N at R7 is positively correlated with yield across  
405 genotypes (Rotundo et al., 2014). The seed protein gain for chamber-grown Benning HP was  
406 similar to that in the field, ca. 3-4%. As Benning HP's maximum protein gain over Benning  
407 seems to be in this 3-4% range, the potential for greater N fixation during seed fill in Benning  
408 HP could contribute to yield maintenance despite higher seed protein.

409 In the field, individual seed weight was lower in Benning HP when considered across the  
410 seed fill period in 2016, and Benning HP's 100 seed weight at harvest was significantly lower in  
411 both years. This is consistent with the findings of Prenger et al. (2019). Based on these findings,  
412 it is possible that Benning HP's higher seed protein concentration is related to reduced weight  
413 accumulation per seed relative to N, but yield is maintained because of Benning HP's ability  
414 to remobilize or fix sufficient N to support a similar total weight of seeds. Genotypic differences  
415 in seed sink strength for N were also observed in an *in vitro* study comparing cotyledon N uptake  
416 by normal and high protein genotypes at a range of N concentrations (Hayati et al., 1996). In that  
417 study, cotyledon N concentration in both genotypes responded positively to N availability in  
418 solution, but the high protein genotype's seeds were able to take up more N at every

419 concentration. Seed N concentration was significantly different between Benning and Benning  
420 HP through most of seed development. The lack of significance for the seed N concentration in  
421 2016 harvest data is probably the result of variability through the canopy (Huber et al., 2016).  
422 Harvest samples were taken from the combine, which homogenized all the seed from a row. In  
423 contrast, samples during seed development were selected from the same canopy position.

424         Directly measuring leaf N requires specialized, expensive instrumentation, and requires  
425 destructive sampling. Chlorophyll content also declines as leaves senesce, and chlorophyll can be  
426 extracted in relatively simple assay (Porra et al., 1989) or estimated non-destructively in the field  
427 (e.g., Lichtenthaler et al., 1996; Cassol et al., 2008; Steele et al., 2008). The N in chlorophyll is  
428 not directly exported from senescing leaves (Hörtensteiner and Feller, 2002), but N from the  
429 concurrent breakdown of chloroplast proteins is an important source of N for remobilization to  
430 vegetative tissue (Fischer, 2007; Liu et al., 2008). Thus, the decline in leaf chlorophyll content  
431 could be a convenient proxy for estimating N remobilization in future studies. We measured leaf  
432 chlorophyll in 2016 to determine if it could be used as a surrogate for N remobilization rates.  
433 However, the decline of leaf chlorophyll content during seed fill did not reveal the difference in  
434 N depletion that was measured in the field in 2016. These results indicate that chlorophyll would  
435 not be reliable for detecting subtle but significant differences in leaf N metabolism.

436         These experiments revealed that the introgressed region of chromosome 20 from  
437 Danbaekkong in the Benning background can increase N fixation as well as the rate of N  
438 remobilization from senescing soybean leaves, but that the phenotypic expression of these traits  
439 may depend on environment and biotic interactions. Whether the changes in these N fluxes are  
440 source or sink driven remains unresolved, and the molecular mechanisms behind these changes  
441 have yet to be elucidated. Although the Gm20 protein locus has been narrowed to a <1Mb region

442 (Vaughn et al., 2014), the protein gain combined with maintaining the high yield potential of  
443 Benning evidently involves multiple genes, as evidenced by large region of Danbaekkong's  
444 chromosome 20 that is present in Benning HP (Prenger et al., 2019). If the gene(s) involved can  
445 be identified, a new path to improving soybean seed composition through breeding or  
446 biotechnology could be illuminated.

447 **Declaration of Competing Interest**

448 The authors declare that there are no conflicts of interest.

449

450 **Acknowledgement**

451 We thank Thomas E. Carter Jr., Paul Cook, Amy Niewoehner, Heather Sims, Jason Pleasant,

452 Cory Callahan, and John Graeber for assistance with planting, tissue sampling, and harvest. We

453 thank Cathy Herring and Travis Lassiter at Central Crops Research Station for field

454 management. We thank Zenglu Li for generously sharing seed for these studies. This work was

455 supported by USDA-ARS [project 6070-21220-069-00-D].

456 **Appendix A. Supplementary material**

457 Table S1. N fixed per nodule weight means (mg/g; top) and *p*-values from ANOVA (bottom) in  
458 chamber experiments 1 and 2. Letters indicate significant differences between genotypes within  
459 a treatment ( $p < 0.05$ ).

460

461 Table S2. Leaf area index, aboveground biomass, and aboveground N measured at 84 – 88 DAP  
462 in 2017, when Benning and Benning HP were in developmental stage R5;  $n = 4$ .

463

464 Table S3. Seed N gained from R5 to R8 in the field in 2017. Seed N gained was calculated as the  
465 difference in mean seed N between R5 and R8. Values are mean  $\pm$  standard error; errors were  
466 propagated as described in the Methods;  $n = 4$ .

467

468 Figure S1. Leaf N concentration and leaf C/N across the growing season for Benning and  
469 Benning HP grown in the field in 2016 and 2017. Leaf tissue was sampled from the uppermost,  
470 fully expanded leaf in the canopy. Significant pairwise differences (FDR-corrected  $p < 0.05$ )  
471 between genotypes on a sampling day are indicated by asterisks. Points and error bars are means  
472  $\pm$  standard error.

473

474 Figure S2. Leaf chlorophyll content during the 2016 seed fill period, R5 and R6. Chlorophyll  
475 was isolated from tissue sampled from the uppermost, fully expanded leaf in the canopy. Slopes  
476 were not significantly different between the two genotypes.



477 **References**

- 478 Benjamini, Y., Hochberg, Y., 1995. Controlling the false discovery rate: a practical and powerful  
479 approach to multiple testing. *J. R. Stat. Soc. Ser. B* 57, 289–300.
- 480 Boerma, H.R., Hussey, R.S., Phillips, D. V, Wood, E.D., Rowan, G.B., Finnerty, S.L., 1997.  
481 Registration of “Benning” soybean. *Crop Sci.* 37, 1982.  
482 <https://doi.org/10.2135/cropsci1997.0011183X003700060061x>
- 483 Brzostowski, L.F., Pruski, T.I., Specht, J.E., Diers, B.W., 2017. Impact of seed protein alleles  
484 from three soybean sources on seed composition and agronomic traits. *Theor. Appl. Genet.*  
485 130, 2315–2326. <https://doi.org/10.1007/s00122-017-2961-x>
- 486 Caldwell, B.E., Vest, G., 1970. Effects of *Rhizobium japonicum* strains on soybean yields. *Crop*  
487 *Sci.* 19, 19–21.
- 488 Cassol, D., De Silva, F.S.P., Falqueto, A.R., Bacarin, M.A., 2008. An evaluation of non-  
489 destructive methods to estimate total chlorophyll content. *Photosynthetica* 46, 634–636.  
490 <https://doi.org/10.1007/s11099-008-0109-6>
- 491 Delamuta, J.R.M., Ribeiro, R.A., Ormeño-Orrillo, E., Melo, I.S., Martínez-Romero, E., Hungria,  
492 M., 2013. Polyphasic evidence supporting the reclassification of *Bradyrhizobium japonicum*  
493 group Ia strains as *Bradyrhizobium diazoefficiens* sp. nov. *Int. J. Syst. Evol. Microbiol.* 63,  
494 3342–3351. <https://doi.org/10.1099/ijms.0.049130-0>
- 495 Diers, B.W., Fehr, W.R., Shoemaker, R.C., 1992. RFLP analysis of soybean seed protein and oil  
496 content. *Theor. Appl. Genet.* 83, 608–612.
- 497 Egli, D.B., Bruening, W.P., 2007. Nitrogen accumulation and redistribution in soybean

- 498 genotypes with variation in seed protein concentration. *Plant Soil* 301, 165–172.  
499 <https://doi.org/10.1007/s11104-007-9434-y>
- 500 Fabre, F., Planchon, C., 2000. Nitrogen nutrition, yield and protein content in soybean. *Plant Sci.*  
501 152, 51–58. [https://doi.org/10.1016/S0168-9452\(99\)00221-6](https://doi.org/10.1016/S0168-9452(99)00221-6)
- 502 Fischer, A.M., 2007. Nutrient remobilization during leaf senescence, in: Gan, S. (Ed.),  
503 *Senescence Processes in Plants*. Blackwell Publishing Ltd, Oxford, UK, pp. 87–107.  
504 <https://doi.org/10.1002/9780470988855.ch5>
- 505 Hayati, R., Egli, D.B., Crafts-Brandner, S.J., 1996. Independence of nitrogen supply and seed  
506 growth in soybean: studies using an *in vitro* culture system. *J. Exp. Bot.* 47, 33–40.  
507 <https://doi.org/10.1093/jxb/47.1.33>
- 508 Hewitt, E.J., 1966. Sand and water culture methods used in the study of plant nutrition, 2nd ed.  
509 Commonwealth Agricultural Bureau, London.
- 510 Hörtensteiner, S., Feller, U., 2002. Nitrogen metabolism and remobilization during senescence. *J.*  
511 *Exp. Bot.* 53, 927–937. <https://doi.org/10.1093/jexbot/53.370.927>
- 512 Huber, S., Li, K., Nelson, R., Ulyanov, A., DeMuro, C., Baxter, I., 2016. Canopy position has a  
513 profound effect on soybean seed composition. *PeerJ* 4, e2452.  
514 <https://doi.org/10.7717/peerj.2452>
- 515 Hwang, E.-Y., Song, Q., Jia, G., Specht, J.E., Hyten, D.L., Costa, J., Cregan, P.B., 2014. A  
516 genome-wide association study of seed protein and oil content in soybean. *BMC Genomics*  
517 15, 1. <https://doi.org/10.1186/1471-2164-15-1>
- 518 Israel, D.W., Jackson, W.A., 1982. Ion balance, uptake, and transport processes in N<sub>2</sub>-fixing and

- 519 nitrate- and urea-dependent soybean plants. *Plant Physiol.* 69, 171–178.  
520 <https://doi.org/10.1104/pp.69.1.171>
- 521 Kim, S.-D., Hong, E.-H., Kim, Y.-H., Lee, S.-H., Seong, Y.-K., Park, K.-Y., Lee, Y.-H., Hwang,  
522 Y.-H., Park, E.-H., Kim, H.-S., Ryu, Y.-H., Park, R.-K., Kim, Y.-S., 1996. A new high  
523 protein and good seed quality soybean variety “Danbaegkong.” *RDA J. Agric. Sci.* 38, 228–  
524 232.
- 525 Kumudini, S., Hume, D.J., Chu, G., 2002. Genetic improvement in short-season soybeans: II.  
526 Nitrogen accumulation, remobilization, and partitioning. *Crop Sci.* 42, 141–145.
- 527 Leffel, R.C., Cregan, P.B., Bolgiano, A.P., Thibeau, D.J., 1992a. Nitrogen metabolism of normal  
528 and high-seed-protein soybean. *Crop Sci.* 32, 747–750.  
529 <https://doi.org/10.2135/cropsci1992.0011183X003200030034x>
- 530 Leffel, R.C., Cregan, P.B., Bolgiano, A.P., 1992b. Nitrogen metabolism of soybean genotypes  
531 selected for seed composition, fasciated stem, or harvest index. *Crop Sci.* 32, 1428–1432.
- 532 Lichtenthaler, H.K., Gitelson, A., Lang, M., 1996. Non-destructive determination of chlorophyll  
533 content of leaves of a green and an aurea mutant of tobacco by reflectance measurements. *J.*  
534 *Plant Physiol.* 148, 483–493. [https://doi.org/10.1016/S0176-1617\(96\)80283-5](https://doi.org/10.1016/S0176-1617(96)80283-5)
- 535 Liu, J., Yun, H.W., Jun, J.Y., Yu, D.L., Fa, F.S., 2008. Protein degradation and nitrogen  
536 remobilization during leaf senescence. *J. Plant Biol.* 51, 11–19.  
537 <https://doi.org/10.1007/BF03030735>
- 538 Lohaus, G., Moellers, C., 2000. Phloem transport of amino acids in two *Brassica napus* L.  
539 genotypes and one *B. carinata* genotype in relation to their seed protein content. *Planta* 211,

- 540 833–40. <https://doi.org/10.1007/s004250000349>
- 541 Mahmoud, A.A., Natarajan, S.S., Bennett, J.O., Mawhinney, T.P., Wiebold, W.J., Krishnan,  
542 H.B., 2006. Effect of six decades of selective breeding on soybean protein composition and  
543 quality: a biochemical and molecular analysis. *J. Agric. Food Chem.* 54, 3916–3922.  
544 <https://doi.org/10.1021/jf060391m>
- 545 Mastrodomenico, A.T., Purcell, L.C., Andy King, C., 2013. The response and recovery of  
546 nitrogen fixation activity in soybean to water deficit at different reproductive developmental  
547 stages. *Environ. Exp. Bot.* 85, 16–21. <https://doi.org/10.1016/j.envexpbot.2012.07.006>
- 548 Morrison, M.J., Voldeng, H.D., Cober, E.R., 2000. Agronomic Changes from 58 Years of  
549 Genetic Improvement of Short-Season Soybean Cultivars in Canada. *Agron. J.* 784, 780–  
550 784.
- 551 Pipolo, A.E., Sinclair, T.R., Camara, G.M.S., 2004. Protein and oil concentration of soybean  
552 seed cultured in vitro using nutrient solutions of differing glutamine concentration. *Ann.*  
553 *Appl. Biol.* 144, 223–227. <https://doi.org/10.1111/j.1744-7348.2004.tb00337.x>
- 554 Porra, R.J., Thompson, W.A., Kriedemann, P.E., 1989. Determination of accurate extinction  
555 coefficients and simultaneous equations for assaying chlorophylls a and b extracted with  
556 four different solvents : verification of the concentration of chlorophyll standards by atomic  
557 absorption spectroscopy. *Biochim. Biophys. Acta* 975, 384–394.
- 558 Prenger, E.M., Ostezan, A., Mian, R., Buckley, B., Stupar, R.M., Glenn, T., Li, Z., 2019.  
559 Introgression of a high protein allele into an elite soybean variety results in a high-protein  
560 near-isogenic line with yield parity. *Crop Sci.* 59, 1–11.  
561 <https://doi.org/10.2135/cropsci2018.12.0767>

- 562 Rainbird, R.M., Hitz, W.D., Hardy, R.W., 1984a. Experimental determination of the respiration  
563 associated with soybean/rhizobium nitrogenase function, nodule maintenance, and total  
564 nodule nitrogen fixation. *Plant Physiol.* 75, 49–53. <https://doi.org/10.1104/pp.75.1.49>
- 565 Rainbird, R.M., Thorne, J.H., Hardy, R.W., 1984b. Role of amides, amino acids, and ureides in  
566 the nutrition of developing soybean seeds. *Plant Physiol.* 74, 329–334.
- 567 Ramirez, M.E., Israel, D.W., Wollum II, A.G., 1997. Phenotypic characterization of soybean  
568 Bradyrhizobia in two soils of North Carolina. *Soil Biol. Biochem.* 29, 1547–1555.
- 569 Rotundo, J.L., Borrás, L., de Bruin, J.D., Pedersen, P., 2014. Soybean nitrogen uptake and  
570 utilization in Argentina and United States cultivars. *Crop Sci.* 54, 1153–1165.  
571 <https://doi.org/10.2135/cropsci2013.09.0618>
- 572 Rotundo, J.L., Borrás, L., Westgate, M.E., 2011. Linking assimilate supply and seed  
573 developmental processes that determine soybean seed composition. *Eur. J. Agron.* 35, 184–  
574 191. <https://doi.org/10.1016/j.eja.2011.05.002>
- 575 Saravitz, C.H., Raper, C.D., 1995. Responses to sucrose and glutamine by soybean embryos  
576 grown in vitro. *Physiol. Plant.* 93, 799–805. [https://doi.org/10.1111/j.1399-  
577 3054.1995.tb05134.x](https://doi.org/10.1111/j.1399-3054.1995.tb05134.x)
- 578 Schubert, K.R., Jennings, N.T., Evans, H.J., 1978. Hydrogen reactions of nodulated leguminous  
579 plants: II. Effects on dry matter accumulation and nitrogen fixation. *Plant Physiol.* 61, 398–  
580 401. <https://doi.org/10.1104/pp.61.3.398>
- 581 Sinclair, T.R., de Wit, C.T., 1976. Analysis of the carbon and nitrogen limitations to soybean  
582 yield. *Agron. J.* 68, 319–324.

- 583 Sinclair, T.R., de Wit, C.T., 1975. Photosynthate and nitrogen requirements for seed production  
584 by various crops. *Science* 189, 565–567. <https://doi.org/10.1126/science.189.4202.565>
- 585 Somasegaran, P., Hoben, H.J., 1985. *Methods in Legume-Rhizobium Technology*. University of  
586 Hawaii Department of Agronomy and Soil Science, Paia, HI.
- 587 Steele, M., Gitelson, A.A., Rundquist, D., 2008. Nondestructive estimation of leaf chlorophyll  
588 content in grapes. *Am. J. Enol. Vitic.* 59, 299–305. <https://doi.org/10.2307/2445170>.
- 589 Vaughn, J.N., Nelson, R.L., Song, Q., Cregan, P.B., Li, Z., 2014. The genetic architecture of  
590 seed composition in soybean is refined by genome-wide association scans across multiple  
591 populations. *G3* 4, 2283–2294. <https://doi.org/10.1534/g3.114.013433>
- 592 Warrington, C. V., Abdel-Haleem, H., Hyten, D.L., Cregan, P.B., Orf, J.H., Killam, A.S.,  
593 Bajjalieh, N., Li, Z., Boerma, H.R., 2015. QTL for seed protein and amino acids in the  
594 Benning × Danbaekkong soybean population. *Theor. Appl. Genet.* 128, 839–850.  
595 <https://doi.org/10.1007/s00122-015-2474-4>
- 596 Zeiher, C., Egli, D.B., Leggett, J.E., Reicosky, D.A., 1982. Cultivar differences in N  
597 redistribution in soybeans. *Agron. J.* 74, 375–379.
- 598
- 599

600 **Figures and Tables**

601 Table 1. ANOVA results for chamber experiment 1, comparing N assimilation at 45 DAT in

602 Benning and Benning HP from NH<sub>4</sub>NO<sub>3</sub> fertilizer, inoculation with *B. diazoefficiens* USDA 110,

603 and *B. elkanii* USDA 31.

| Source                 | DF | Sum of Squares | Mean Square | Error DF | F Value | <i>p</i> -value    |
|------------------------|----|----------------|-------------|----------|---------|--------------------|
| genotype               | 1  | 2012.6         | 2012.6      | 30       | 6.87    | <b>0.0136</b>      |
| N treatment            | 2  | 160308         | 80154       | 30       | 273.51  | <b>&lt; 0.0001</b> |
| genotype × N treatment | 2  | 663.6          | 331.8       | 30       | 1.13    | 0.3357             |
| residual               | 30 | 8791.8         | 293.1       | .        | .       | .                  |

604

605 Figure 1. Total nitrogen assimilated per plant (mg) for plants supplied with  $\text{NH}_4\text{NO}_3$  fertilizer,  
606 inoculated with *B. diazoefficiens* USDA 110, or inoculated with *B. elkanii* USDA 31 in chamber  
607 experiment 1. Whole plants were harvested 45 days after transplanting. Values are mean  $\pm$   
608 standard error;  $n = 4$ . Asterisks indicate significant differences ( $p < 0.05$ ) between genotypes  
609 within N treatment.

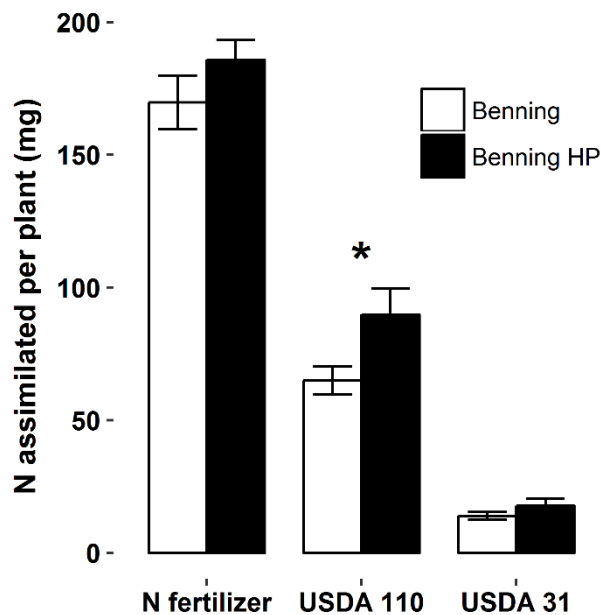

610



611 Table 2. Seed protein concentration, seed N concentration, seed C/N, and total seed weight per  
612 plant at maturity from plants relying on nitrogen fixation with *B. diazoefficiens* USDA 110 in  
613 chamber experiment 2. Seed protein concentration is expressed on a 13% moisture basis. *P*-value  
614 for genotype effect on each variable shown in bottom row. Values are means for each genotype;  
615  $n = 5$ .

| Genotype        | Seed protein concentration (%) | Seed N concentration (%) | seed C/N      | Seed weight per plant (g) |
|-----------------|--------------------------------|--------------------------|---------------|---------------------------|
| Benning         | 37.5                           | 6.5                      | 8.2           | 69.0                      |
| Benning HP      | 41.3                           | 7.7                      | 6.8           | 82.8                      |
| <i>p</i> -value | <b>&lt;0.0001</b>              | <b>0.0179</b>            | <b>0.0022</b> | 0.1554                    |

616

617 Table 3. ANOVA results for chamber experiment 2, total nitrogen fixed per plant and nitrogen  
 618 per organ measured in Benning and Benning HP at four developmental stages. Analysis  
 619 corresponds with data presented in Figure 2. Reproductive tissue includes seeds and pods.

| Test                | Source           | DF | Sum of Squares | Mean Square | Error DF | F Value | p-value            |
|---------------------|------------------|----|----------------|-------------|----------|---------|--------------------|
| whole plant         | genotype         | 1  | 3204975        | 3204975     | 31       | 8.23    | <b>0.0074</b>      |
|                     | stage            | 3  | 171682989      | 57227663    | 31       | 146.92  | <b>&lt; 0.0001</b> |
|                     | genotype × stage | 3  | 4487722        | 1495907     | 31       | 3.84    | <b>0.0190</b>      |
|                     | residual         | 31 | 12075101       | 389519      | .        | .       | .                  |
| reproductive tissue | genotype         | 1  | 4146291        | 4146291     | 23       | 14.17   | <b>0.0010</b>      |
|                     | stage            | 2  | 122288498      | 61144249    | 23       | 208.91  | <b>&lt; 0.0001</b> |
|                     | genotype × stage | 2  | 3981910        | 1990955     | 23       | 6.8     | <b>0.0048</b>      |
|                     | residual         | 23 | 6731820        | 292688      | .        | .       | .                  |
| shoot               | genotype         | 1  | 100            | 100         | 31       | 0       | 0.9661             |
|                     | stage            | 3  | 17146518       | 5715506     | 31       | 104.5   | <b>&lt;.0001</b>   |
|                     | genotype × stage | 3  | 146004         | 48668       | 31       | 0.89    | 0.4573             |
|                     | residual         | 31 | 1695501        | 54694       | .        | .       | .                  |
| root                | genotype         | 1  | 61             | 61          | 31       | 0.36    | 0.5507             |
|                     | stage            | 3  | 9912           | 3304        | 31       | 19.75   | <b>&lt; 0.0001</b> |
|                     | genotype × stage | 3  | 305            | 102         | 31       | 0.61    | 0.6155             |
|                     | residual         | 31 | 5186           | 167         | .        | .       | .                  |
| nodules             | genotype         | 1  | 709            | 709         | 24       | 3.5     | 0.0738             |
|                     | stage            | 2  | 100095         | 50048       | 24       | 246.57  | <b>&lt; 0.0001</b> |
|                     | genotype × stage | 2  | 668            | 334         | 24       | 1.64    | 0.2141             |
|                     | residual         | 24 | 4871           | 203         | .        | .       | .                  |

620

621 Figure 2. N per plant (mg) in Benning and Benning HP relying on nitrogen fixation with *B.*  
622 *diazoefficiens* USDA 110 in chamber experiment 2. Values are means ( $n = 5$ ). Annotations  
623 indicate FDR-corrected  $p$ -value for significant differences between genotypes in N content per  
624 organ; ANOVA results corresponding with these data are presented in Table 3. Scale on left  
625 applies to V5; scale on right applies to R5 – R8. Ben = Benning; BHP = Benning HP.

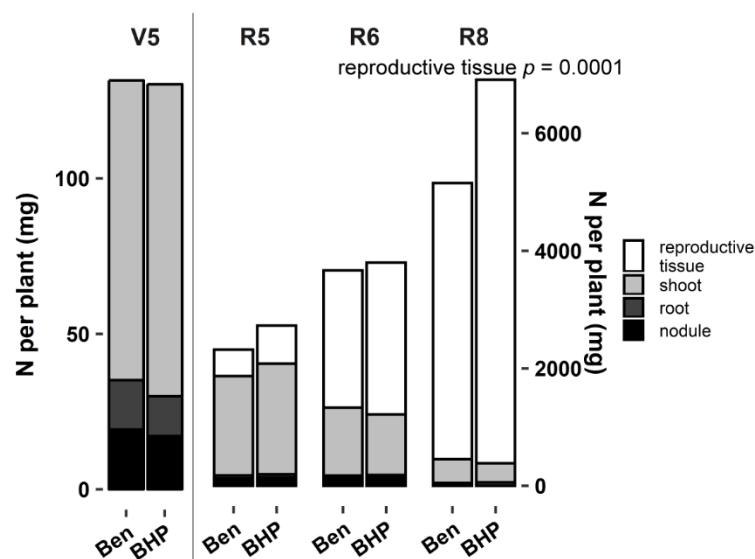

626

627 Table 4. Nitrogen lost per plant (mg) from vegetative tissues and nitrogen gained in reproductive  
 628 tissues between developmental stages in chamber experiment 2. Nitrogen fixed during each  
 629 period was estimated as the difference between reproductive N gained and vegetative N lost.  
 630 Values are mean  $\pm$  standard error; errors were propagated using equation 4 as described in the  
 631 Materials and Methods.

| Genotype                              | R5 – R6           |                       |                   | R6 – R8           |                       |                   |
|---------------------------------------|-------------------|-----------------------|-------------------|-------------------|-----------------------|-------------------|
|                                       | Vegetative N lost | Reproductive N gained | Estimated N fixed | Vegetative N lost | Reproductive N gained | Estimated N fixed |
| ----- (mg plant <sup>-1</sup> ) ----- |                   |                       |                   |                   |                       |                   |
| Benning                               | 540 $\pm$ 213     | 1887 $\pm$ 153        | 1373 $\pm$ 262    | 875 $\pm$ 164     | 2363 $\pm$ 488        | 1488 $\pm$ 515    |
| Benning HP                            | 867 $\pm$ 169     | 1940 $\pm$ 121        | 1073 $\pm$ 208    | 833 $\pm$ 46      | 3945 $\pm$ 359        | 3112 $\pm$ 362    |

632

633 Table 5. Mean yield, seed protein concentration, seed N concentration, and seed size at  
 634 developmental maturity in field experiments. Seed protein is expressed on a 13% moisture basis;  
 635  $n = 4$ .

| Genotype        | 2016                          |                                      |                                |                                             | 2017                          |                                      |                                |                                             |
|-----------------|-------------------------------|--------------------------------------|--------------------------------|---------------------------------------------|-------------------------------|--------------------------------------|--------------------------------|---------------------------------------------|
|                 | Yield<br>(g m <sup>-2</sup> ) | Seed protein<br>concentration<br>(%) | Seed N<br>concentration<br>(%) | Seed size<br>(g 100<br>seed <sup>-1</sup> ) | Yield<br>(g m <sup>-2</sup> ) | Seed protein<br>concentration<br>(%) | Seed N<br>concentration<br>(%) | Seed size<br>(g 100<br>seed <sup>-1</sup> ) |
| Benning         | 206.5                         | 39.1                                 | 6.5                            | 16.9                                        | 218.1                         | 34.8                                 | 5.9                            | 16.1                                        |
| Benning<br>HP   | 214.6                         | 41.9                                 | 6.8                            | 14.8                                        | 194.3                         | 39.0                                 | 6.5                            | 15.1                                        |
| <i>p</i> -value | 0.6005                        | <b>0.0011</b>                        | 0.4093                         | <b>0.0406</b>                               | 0.1843                        | <b>&lt;0.0001</b>                    | <b>0.0267</b>                  | <b>0.0155</b>                               |

636

637 Figure 3. Individual seed weight, seed N concentration, and seed C/N during seed fill for  
 638 Benning and Benning HP grown in the field. Significant pairwise differences (FDR-corrected  $p <$   
 639 0.05) between the genotypes within days are indicated by asterisks. Points and error bars are  
 640 means  $\pm$  standard error.

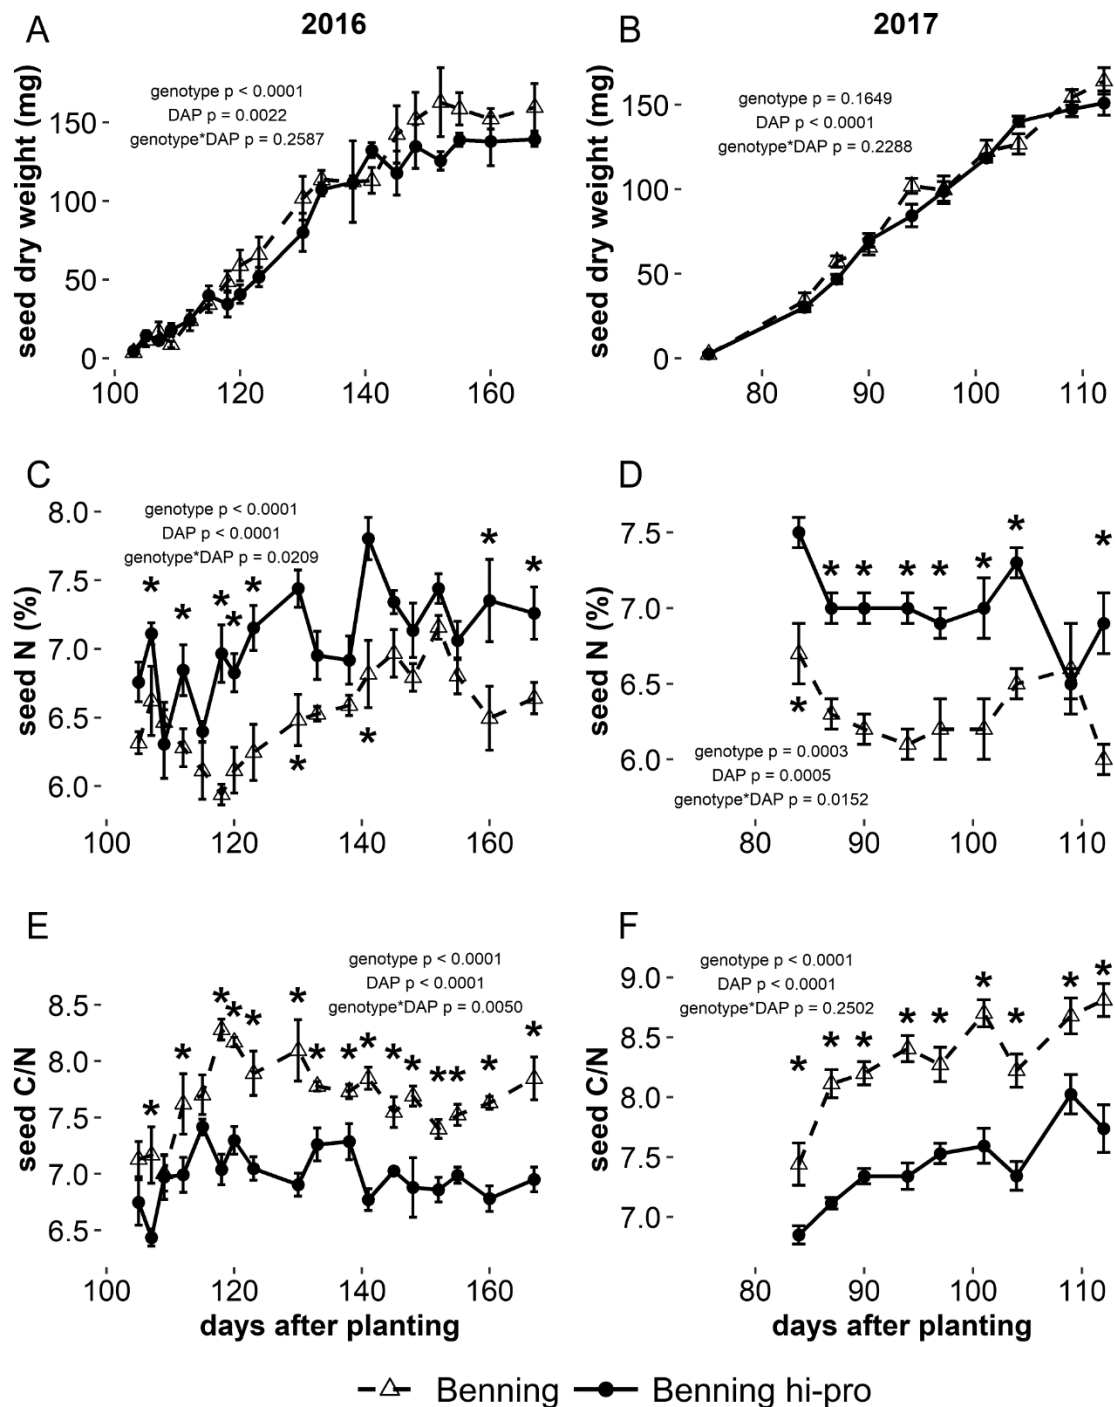

641

642

643 Figure 4. Leaf N concentration and C/N change during the seed fill period, R5 and R6. Dashed  
644 and solid lines are predicted values for leaf N concentration and C/N in Benning and Benning HP  
645 from the linear model. *P*-values indicate significance of fixed effects in the model.  
646

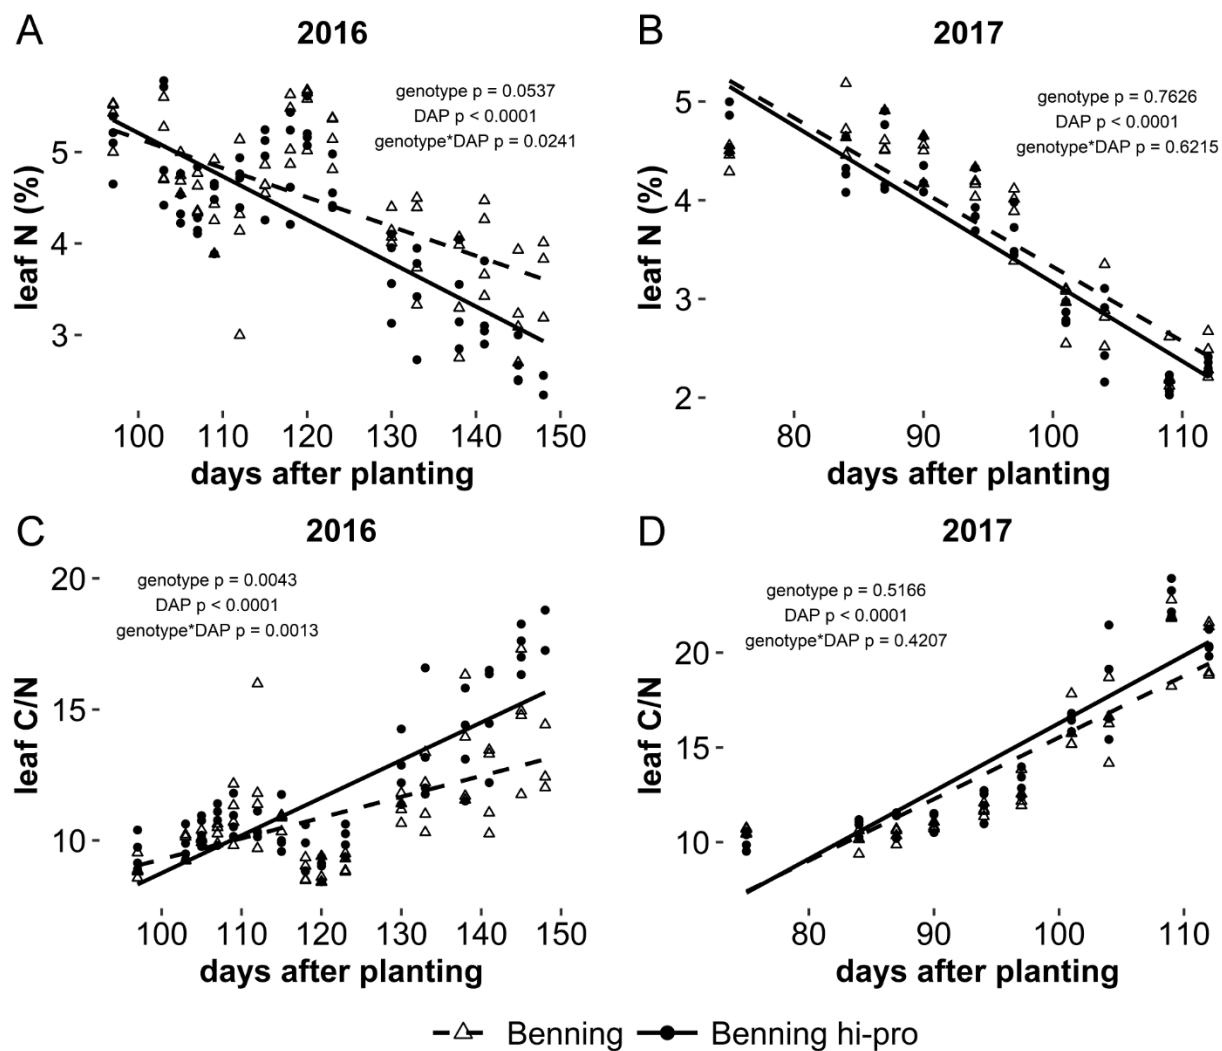

647

648
